# Supplementary material
Source: ML conference proceedings conference paper supplement (https://openaccess.thecvf.com/content/WACV2025/html/Nishizawa_SyncViolinist_Music-Oriented_Violin_WACV_2025_paper.html)
Supplement: Supplementary file 1 [file Nishizawa_SyncViolinist_Music-Oriented_Violin_WACV_2025_supplemental.zip]

# Supplementary Material – SyncViolinist: Music-Oriented Violin Motion Generation Based on Bowing and Fingering

Hiroki Nishizawa<sup>1\*</sup> Keitaro Tanaka<sup>1\*</sup> Asuka Hirata<sup>1\*</sup> Shugo Yamaguchi<sup>1</sup>  
Qi Feng<sup>2†</sup> Masatoshi Hamanaka<sup>3</sup> Shigeo Morishima<sup>2</sup>  
<sup>1</sup>Waseda University <sup>2</sup>Waseda Research Institute for Science and Engineering <sup>3</sup>RIKEN

## 1. Dataset Post-processing and Synchronization

To meet the needs of our model training task, we post-processed the recorded audio, motion, and bowing/fingering information.

First, to extract audio features from the recorded signals, we used librosa, a Python library for music signal processing [3]. We applied a short-time Fourier transform (STFT) with a sliding window of length 2048 samples and a hop size of 1/30 seconds to obtain a 128-dimensional Mel-scaled spectrogram  $X \in \mathbb{R}^{T \times 128}$ .

Next, we used Shogun<sup>1</sup>, a motion editing software, to process the motion data and obtain the rotation information in Euler angles for 61 joints and the 3D positions of the root (24 for the body and 38 for the fingers). Next, we downsampled the motion data to 30 fps and calculated the 3D joint position  $Y \in \mathbb{R}^{T \times 62 \times 3}$  from the rotation representation using forward kinematics, where  $T$  represents the number of time frames. Additionally, we retargeted the motion data to a common skeleton to eliminate the effect of variations in the violinists' body sizes and shapes while keeping their hand and fingertip positions intact.

Finally, to obtain the fingering and bowing information that is synchronized with the motion data, we used both the recorded MIDI signals and the MusicXML scores that were annotated by the violinists. It is worth noting that the MIDI signals were recorded simultaneously with the audio signals; thus, by annotating each label of the bowing/fingering information for each MIDI note, synchronization of audio features and bowing/fingering information can also be guaranteed at the same time. Since the bow direction and finger number labels were annotated in MusicXML by the violinists themselves, we were able to correspond the bow direction and finger number labels for each MIDI note actually played by synchronizing the MusicXML with the MIDI signals using a MIDI-to-score alignment method [4]. How-

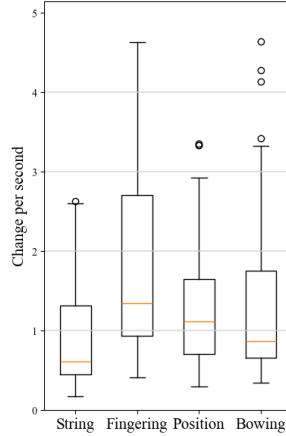

Figure 1. Statistics of motions of each component.

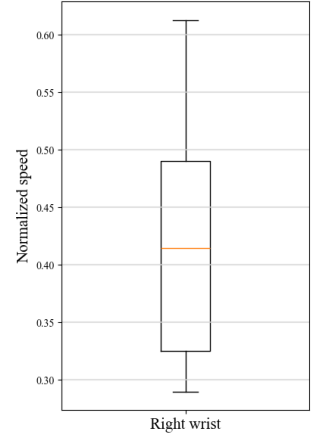

Figure 2. Speed statistics of wrist motions.

ever, since this alignment is sometimes inaccurate, we manually corrected the information. For string labels, we obtained them by identifying which of the four channels had the largest output at each time frame since the MIDI violin used in our dataset acquisition process had outputs from different channels for each of the four strings. As for position labels, we decided them from the recorded MIDI note number (*i.e.*, pitch), played string, and the finger number obtained above.

After annotating each label in bowing/fingering information to the MIDI notes, we converted them to ensure that they were consistent with the time frame of audio features.

## 2. Dataset Analysis

To ensure the diversity of the dataset, we conducted a comprehensive analysis covering both motion patterns and the music pieces included. Figure 1 presents statistics on the key motion components of the dataset, while Fig. 2 illustrates the variation in the right wrist's speed. Additionally, Figs. 3, 4, and 5 demonstrate the diversity of the musical pieces included in the proposed dataset.

\*The first three authors contributed equally.

†Corresponding author.

<sup>1</sup><https://www.vicon.com/software/shogun/>

### 3. Joint Details

Diagrams of the captured joints are illustrated in Fig. 6. Furthermore, additional lists (Tables 1 and 2) give the details of the joints available in the proposed dataset. To benchmark the dataset, we re-implemented previous models with minimal modifications (i.e. only reshaping the input and output dimensions, see Table 3) to account for the different numbers of key points.

### 4. Detailed Subjective Evaluation Results

Figure 7 presents the detailed results of the subjective evaluation. The left side shows the naturalness evaluation compared to other state-of-the-art methods, while the right side shows the naturalness evaluation compared to other ablation conditions. Tracks 1 and 2, 3 to 5, and 6 to 8 correspond to the test data of players 1, 2, and 3, respectively.

### References

- [1] Jiali Chen, Changjie Fan, Zhimeng Zhang, Gongzheng Li, Zeng Zhao, Zhigang Deng, and Yu Ding. A music-driven deep generative adversarial model for guzheng playing animation. *IEEE Transactions on Visualization and Computer Graphics*, 29(2):1400–1414, 2023. 6
- [2] Hsuan-Kai Kao and Li Su. Temporally guided music-to-body-movement generation. In *Proceedings of the ACM International Conference on Multimedia*, pages 147–155, 2020. 6
- [3] Brian McFee, Colin Raffel, Dawen Liang, Daniel PW Ellis, Matt McVicar, Eric Battenberg, and Oriol Nieto. librosa: Audio and music signal analysis in python. In *Proceedings of the 14th python in science conference*, pages 18–25, 2015. 1
- [4] Eita Nakamura, Kazuyoshi Yoshii, and Haruhiro Katayose. Performance error detection and post-processing for fast and accurate symbolic music alignment. In *Proceedings of the Conference of the International Society for Music Information Retrieval*, pages 347–353, 2017. 1
- [5] Eli Shlizerman, Lucio Dery, Hayden Schoen, and Ira Kemelmacher-Shlizerman. Audio to body dynamics. In *Proceedings of the IEEE Conference on Computer Vision and Pattern Recognition*, pages 7574–7583, 2018. 6

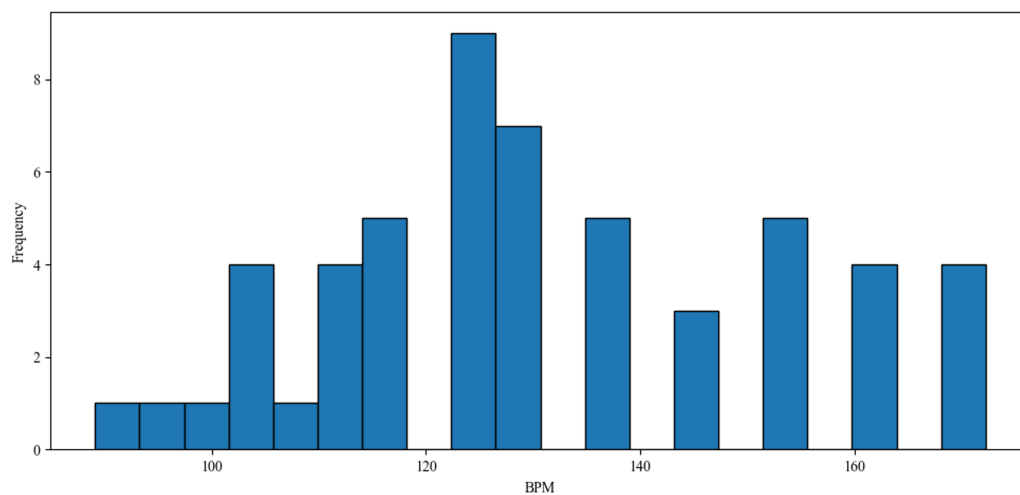

Figure 3. BPM distribution.

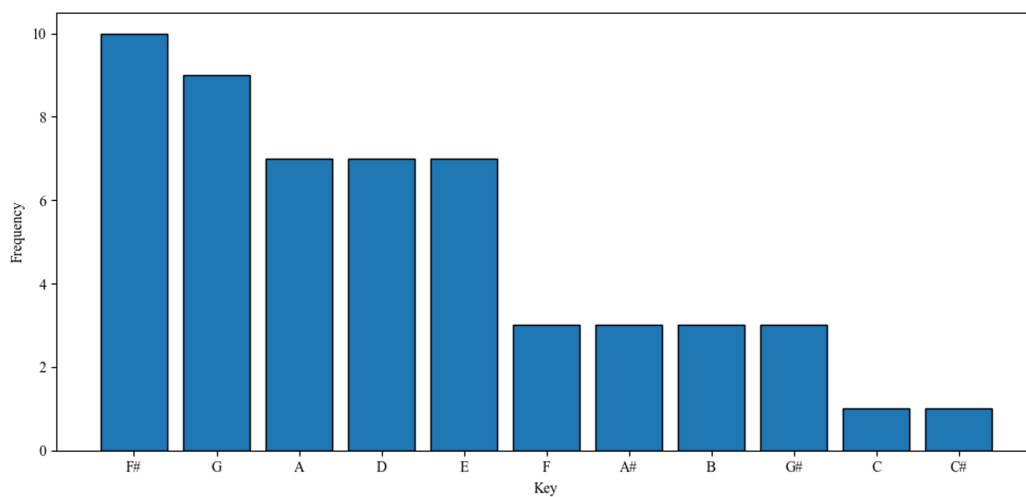

Figure 4. Key distribution.

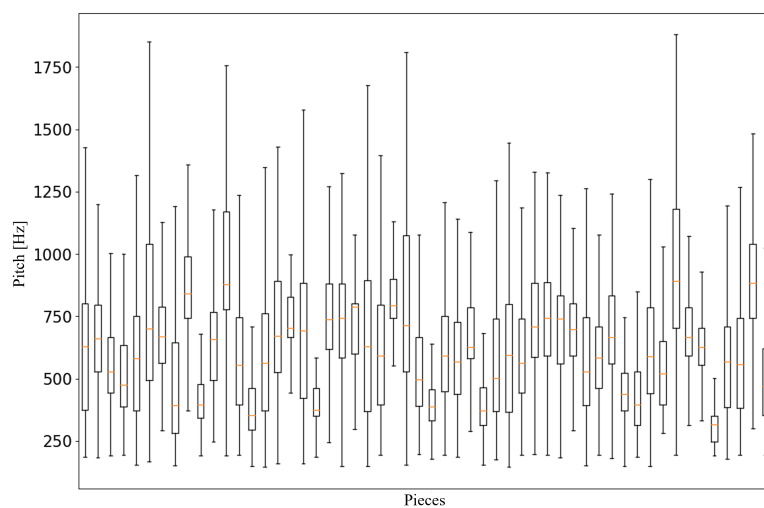

Figure 5. Pitch distribution.

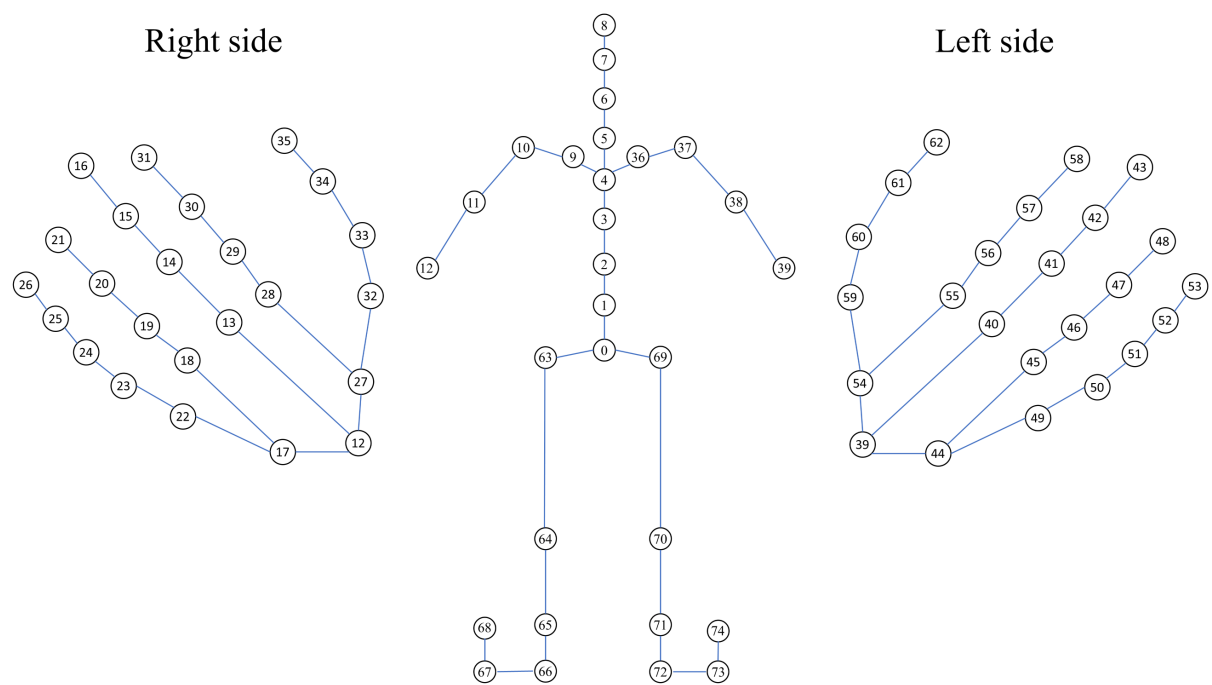

Figure 6. Diagrams of the captured joints from the proposed dataset.

| Node number | Joint name       | Parent node | Body parts    |                |
|-------------|------------------|-------------|---------------|----------------|
|             |                  |             | in generation | in evaluation  |
| 0           | Hips             | -           | Others        | -              |
| 1           | Spine            | 0           | Others        | -              |
| 2           | Spine1           | 1           | Others        | -              |
| 3           | Spine2           | 2           | Others        | -              |
| 4           | Spine3           | 3           | Others        | -              |
| 5           | Neck             | 4           | Others        | -              |
| 6           | Neck1            | 5           | Others        | -              |
| 7           | Head             | 6           | Others        | -              |
| 8           | End Site         | 7           | Others        | -              |
| 9           | RightShoulder    | 4           | Others        | -              |
| 10          | RightArm         | 9           | Others        | -              |
| 11          | RightForeArm     | 10          | Right hand    | Right arm (RA) |
| 12          | RightHand        | 11          | Right hand    | Right arm (RA) |
| 13          | RightHandMiddle1 | 12          | Right hand    | -              |
| 14          | RightHandMiddle2 | 13          | Right hand    | -              |
| 15          | RightHandMiddle3 | 14          | Right hand    | -              |
| 16          | End Site         | 15          | Right hand    | -              |
| 17          | RightHandRing    | 12          | Right hand    | -              |
| 18          | RightHandRing1   | 17          | Right hand    | -              |
| 19          | RightHandRing2   | 18          | Right hand    | -              |
| 20          | RightHandRing3   | 19          | Right hand    | -              |
| 21          | End Site         | 20          | Right hand    | -              |
| 22          | RightHandPinky   | 17          | Right hand    | -              |
| 23          | RightHandPinky1  | 22          | Right hand    | -              |
| 24          | RightHandPinky2  | 23          | Right hand    | -              |
| 25          | RightHandPinky3  | 24          | Right hand    | -              |
| 26          | End Site         | 25          | Right hand    | -              |
| 27          | RightHandIndex   | 12          | Right hand    | -              |
| 28          | RightHandIndex1  | 27          | Right hand    | -              |
| 29          | RightHandIndex2  | 28          | Right hand    | -              |
| 30          | RightHandIndex3  | 29          | Right hand    | -              |
| 31          | End Site         | 30          | Right hand    | -              |
| 32          | RightHandThumb1  | 27          | Right hand    | -              |
| 33          | RightHandThumb2  | 32          | Right hand    | -              |
| 34          | RightHandThumb3  | 33          | Right hand    | -              |
| 35          | End Site         | 34          | Right hand    | -              |

Table 1. Detailed list of the captured joints from the proposed dataset (1/2).

| Node number | Joint name      | Parent node | Body parts    |                   |
|-------------|-----------------|-------------|---------------|-------------------|
|             |                 |             | in generation | in evaluation     |
| 36          | LeftShoulder    | 4           | Others        | -                 |
| 37          | LeftArm         | 36          | Others        | -                 |
| 38          | LeftForeArm     | 37          | Left arm      | Left arm (LA)     |
| 39          | LeftHand        | 38          | Left arm      | Left arm (LA)     |
| 40          | LeftHandMiddle1 | 39          | Left hand     | -                 |
| 41          | LeftHandMiddle2 | 40          | Left hand     | -                 |
| 42          | LeftHandMiddle3 | 41          | Left hand     | -                 |
| 43          | End Site        | 42          | Left hand     | Left fingers (LF) |
| 44          | LeftHandRing    | 39          | Left hand     | -                 |
| 45          | LeftHandRing1   | 44          | Left hand     | -                 |
| 46          | LeftHandRing2   | 45          | Left hand     | -                 |
| 47          | LeftHandRing3   | 46          | Left hand     | -                 |
| 48          | End Site        | 47          | Left hand     | Left fingers (LF) |
| 49          | LeftHandPinky   | 44          | Left hand     | -                 |
| 50          | LeftHandPinky1  | 49          | Left hand     | -                 |
| 51          | LeftHandPinky2  | 50          | Left hand     | -                 |
| 52          | LeftHandPinky3  | 51          | Left hand     | -                 |
| 53          | End Site        | 52          | Left hand     | Left fingers (LF) |
| 54          | LeftHandIndex   | 39          | Left hand     | -                 |
| 55          | LeftHandIndex1  | 54          | Left hand     | -                 |
| 56          | LeftHandIndex2  | 55          | Left hand     | -                 |
| 57          | LeftHandIndex3  | 56          | Left hand     | -                 |
| 58          | End Site        | 57          | Left hand     | Left fingers (LF) |
| 59          | LeftHandThumb1  | 54          | Left hand     | -                 |
| 60          | LeftHandThumb2  | 59          | Left hand     | -                 |
| 61          | LeftHandThumb3  | 60          | Left hand     | -                 |
| 62          | End Site        | 61          | Left hand     | Left fingers (LF) |
| 63          | RightUpLeg      | 0           | Others        | -                 |
| 64          | RightLeg        | 63          | Others        | -                 |
| 65          | RightFoot       | 64          | Others        | -                 |
| 66          | RightForeFoot   | 65          | Others        | -                 |
| 67          | RightToeBase    | 66          | Others        | -                 |
| 68          | End Site        | 67          | Others        | -                 |
| 69          | LeftUpLeg       | 0           | Others        | -                 |
| 70          | LeftLeg         | 69          | Others        | -                 |
| 71          | LeftFoot        | 70          | Others        | -                 |
| 72          | LeftForeFoot    | 71          | Others        | -                 |
| 73          | LeftToeBase     | 72          | Others        | -                 |
| 74          | End Site        | 73          | Others        | -                 |

Table 2. Detailed list of the captured joints from the proposed dataset (2/2).

| Method                | before | after |
|-----------------------|--------|-------|
| Shlizerman et al. [5] | 98     | 255   |
| Kao and Su [2]        | 45     | 225   |
| Chen et al. [1]       | 188    | 248   |
| <b>Ours</b>           | -      | 225   |

Table 3. Reshaping of dimensions for existing methods.

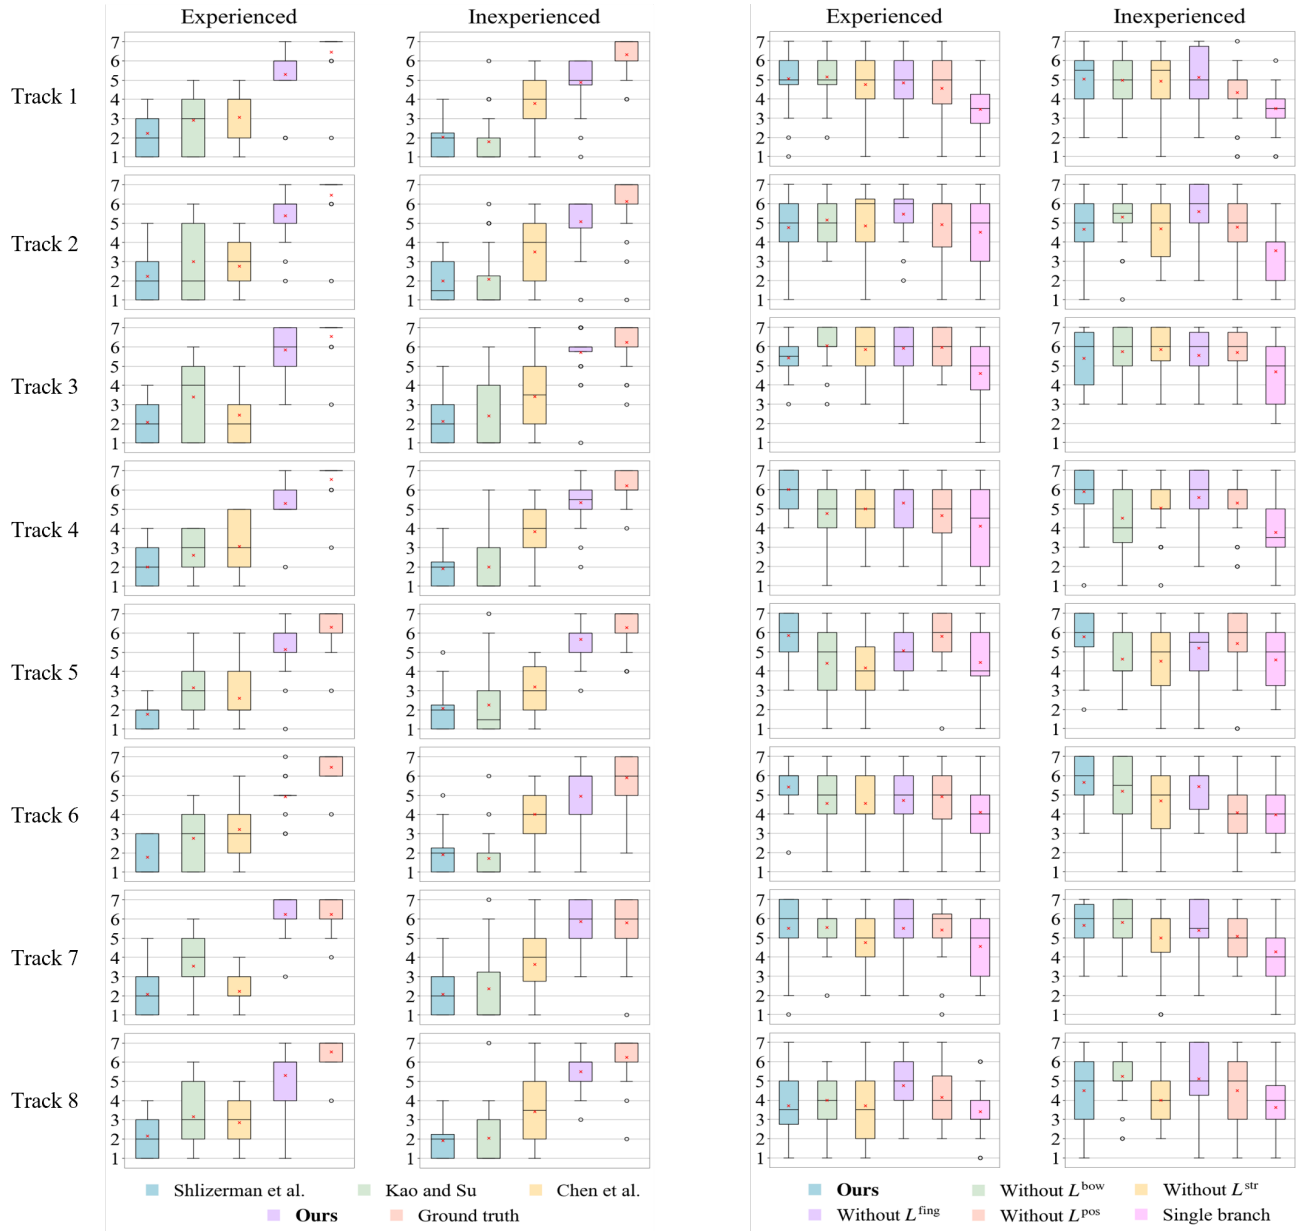

Figure 7. Detailed results of the subjective evaluation against state-of-the-art methods (left) and ablative conditions (right).
